# Supplementary material
Source: PubMed Central journal article supplement (PMC3235584)
Supplement: NIHMS319149-supplement-2.pdf [file NIHMS319149-supplement-2.pdf]

**Supplementary Table 1. Fold change of miR-33 heptamer-matched genes in the liver after 4 weeks of treatment**

| Gene id   | Gene Title                                                                           | Fold Change | P-Value |
|-----------|--------------------------------------------------------------------------------------|-------------|---------|
| ABCA1     | ATP-binding cassette, sub-family A (ABC1), member 1                                  | 1.46        | 0.0041  |
| RGS5      | regulator of G-protein signaling 5                                                   | 1.36        | 0.0297  |
| SLC22A23  | solute carrier family 22, member 23                                                  | 1.29        | 0.0069  |
| C1orf158  | chromosome 1 open reading frame 158                                                  | 1.28        | 0.0044  |
| PIN4      | (peptidylprolyl cis/trans isomerase) NIMA-interacting, 4 (parvulin)                  | 1.27        | 0.0006  |
| FLT1      | fms-related tyrosine kinase 1 (VEGF/vascular permeability factor receptor)           | 1.26        | 0.0085  |
| CLEC10A   | C-type lectin domain family 10, member A                                             | 1.26        | 0.0023  |
| STS       | steroid sulfatase (microsomal), isozyme S                                            | 1.26        | 0.0047  |
| IRAK3     | interleukin-1 receptor-associated kinase 3                                           | 1.23        | 0.0166  |
| EFNA5     | ephrin-A5                                                                            | 1.23        | 0.0350  |
| PAX5      | paired box 5                                                                         | 1.21        | 0.0179  |
| ABAT      | 4-aminobutyrate aminotransferase                                                     | 1.21        | 0.0393  |
| ATP2B2    | ATPase, Ca <sup>++</sup> transporting, plasma membrane 2                             | 1.21        | 0.0295  |
| ZNF300    | zinc finger protein 300                                                              | 1.21        | 0.0110  |
| THSD4     | thrombospondin, type I, domain containing 4                                          | 1.20        | 0.0246  |
| TMEM133   | transmembrane protein 133                                                            | 1.20        | 0.0431  |
| SCN1A     | sodium channel, voltage-gated, type I, alpha subunit                                 | 1.20        | 0.0460  |
| COLQ      | collagen-like tail subunit of asymmetric acetylcholinesterase                        | 1.20        | 0.0159  |
| SIRPG     | signal-regulatory protein gamma                                                      | 1.20        | 0.0145  |
| CRHR2     | corticotropin releasing hormone receptor 2                                           | 1.19        | 0.0276  |
| CNPY1     | canopy 1 homolog (zebrafish)                                                         | 1.19        | 0.0024  |
| LPCAT2    | lysophosphatidylcholine acyltransferase 2                                            | 1.19        | 0.0167  |
| NTRK2     | neurotrophic tyrosine kinase, receptor, type 2                                       | 1.19        | 0.0041  |
| RCN1      | reticulocalbin 1, EF-hand calcium binding domain                                     | 1.19        | 0.0228  |
| GOPC      | golgi-associated PDZ and coiled-coil motif containing                                | 1.18        | 0.0330  |
| FAM81A    | family with sequence similarity 81, member A                                         | 1.18        | 0.0253  |
| S100A7A   | S100 calcium binding protein A7A                                                     | 1.17        | 0.0125  |
| PURB      | purine-rich element binding protein B                                                | 1.17        | 0.0313  |
| RTKN2     | rhotekin 2                                                                           | 1.17        | 0.0036  |
| SLC26A1   | solute carrier family 26 (sulfate transporter), member 1                             | 1.17        | 0.0155  |
| CRY2      | cryptochrome 2 (photolyase-like)                                                     | 1.17        | 0.0054  |
| DPPA4     | developmental pluripotency associated 4                                              | 1.17        | 0.0370  |
| SPDYE1    | speedy homolog E1 ( <i>Xenopus laevis</i> )                                          | 1.17        | 0.0216  |
| OPN4      | opsin 4                                                                              | 1.16        | 0.0398  |
| C19orf25  | chromosome 19 open reading frame 25                                                  | 1.16        | 0.0358  |
| SERPINA9  | serpin peptidase inhibitor, clade A ( $\alpha$ 1 antitrypsin, antitrypsin), member 9 | 1.15        | 0.0340  |
| KCNH8     | potassium voltage-gated channel, subfamily H (eag-related), member 8                 | 1.15        | 0.0129  |
| TNFRSF11A | TNF receptor superfamily, member 11a, NFkB activator                                 | 1.15        | 0.0221  |
| VTCN1     | V-set domain containing T cell activation inhibitor 1                                | 1.15        | 0.0394  |
| ZFAT      | zinc finger and AT hook domain containing                                            | 1.15        | 0.0298  |
| CDRT4     | CMT1A duplicated region transcript 4                                                 | 1.15        | 0.0447  |
| C16orf57  | chromosome 16 open reading frame 57                                                  | 1.15        | 0.0114  |
| DIRAS2    | DIRAS family, GTP-binding RAS-like 2                                                 | 1.15        | 0.0108  |

Fold change of miR-33 heptamer matched target genes in livers of anti-miR-33 vs control anti-miR treated monkeys (n=6) with an uncorrected p value of <0.05.

**Supplementary Table 2. Fold change of miR-33 heptamer-matched genes in the liver after 12 weeks of treatment**

| <b>Gene id</b> | <b>Gene Title</b>                                                           | <b>Fold Change</b> | <b>P-Value</b> |
|----------------|-----------------------------------------------------------------------------|--------------------|----------------|
| FETUB          | fetuin B                                                                    | 1.57               | 0.0058         |
| HADHB          | hydroxyacyl-CoA dehydrogenase/3-ketoacyl-CoA thiolase/enoyl-CoA hydratase   | 1.43               | 0.0173         |
| ATP2B2         | ATPase, Ca <sup>++</sup> transporting, plasma membrane 2                    | 1.37               | 0.0011         |
| PIN4           | protein (peptidylprolyl cis/trans isomerase) NIMA-interacting, 4 (parvulin) | 1.33               | 0.0001         |
| SLC35A3        | solute carrier family 35 (UDP-N-acetylglucosamine (UDP-GlcNAc) transporter  | 1.33               | 0.0418         |
| CROT           | carnitine O-octanoyltransferase                                             | 1.27               | 0.0079         |
| SCRN3          | secernin 3                                                                  | 1.24               | 0.0448         |
| SLC20A2        | solute carrier family 20 (phosphate transporter), member 2                  | 1.24               | 0.0201         |
| LMBR1          | limb region 1 homolog (mouse)                                               | 1.21               | 0.0296         |
| C10orf31       | chromosome 10 open reading frame 31                                         | 1.19               | 0.0196         |
| BCL10          | B-cell CLL/lymphoma 10                                                      | 1.18               | 0.0349         |
| KLHL3          | kelch-like 3 (Drosophila)                                                   | 1.18               | 0.0060         |
| IRF6           | interferon regulatory factor 6                                              | 1.18               | 0.0209         |
| B3GNT7         | UDP-GlcNAc:betaGal beta-1,3-N-acetylglucosaminyltransferase 7               | 1.17               | 0.0235         |
| PRIMA1         | proline rich membrane anchor 1                                              | 1.17               | 0.0482         |
| IRAK2          | interleukin-1 receptor-associated kinase 2                                  | 1.17               | 0.0206         |
| FGA            | fibrinogen alpha chain                                                      | 1.16               | 0.0452         |
| BACH1          | BTB and CNC homology 1, basic leucine zipper transcription factor 1         | 1.16               | 0.0075         |
| CPD            | carboxypeptidase D                                                          | 1.15               | 0.0373         |
| ZNF347         | zinc finger protein 347                                                     | 1.15               | 0.0475         |

Fold change of miR-33 heptamer matched target genes in livers of anti-miR-33 vs control anti-miR treated monkeys (n=6) with an uncorrected p value of <0.05.

**Supplemental Table 3. Composition of semisynthetic diet**

| Ingredient               | g/100 g dry weight |
|--------------------------|--------------------|
| Oleic Blend              | 4.0000             |
| Fish Oil                 | 0.2000             |
| Casein, USP              | 8.0000             |
| Lactalbumin              | 4.0000             |
| Fructose                 | 20.0000            |
| Sucrose                  | 20.0000            |
| Applesauce, sweetened    | 4.5000             |
| Wheat Flour, self-rising | 22.2050            |
| Crystalline Cholesterol  | 0.0640             |
| Sitosterol               | 0.0068             |
| Alphacel                 | 9.5000             |
| Vitamin Mixture          | 2.5000             |
| Hegsted Salt Mixture     | 5.0000             |
| Tenox 20A                | 0.0080             |
| MTS-50                   | 0.0122             |
| Vit E 5-67               | 0.0040             |
| TOTAL                    | 100.0              |
| Macronutrient            | Calories (%)       |
| Fat                      | 12                 |
| Carbohydrate             | 71                 |
| Protein                  | 17                 |

## Supplementary Figure 1. Rayner et al.

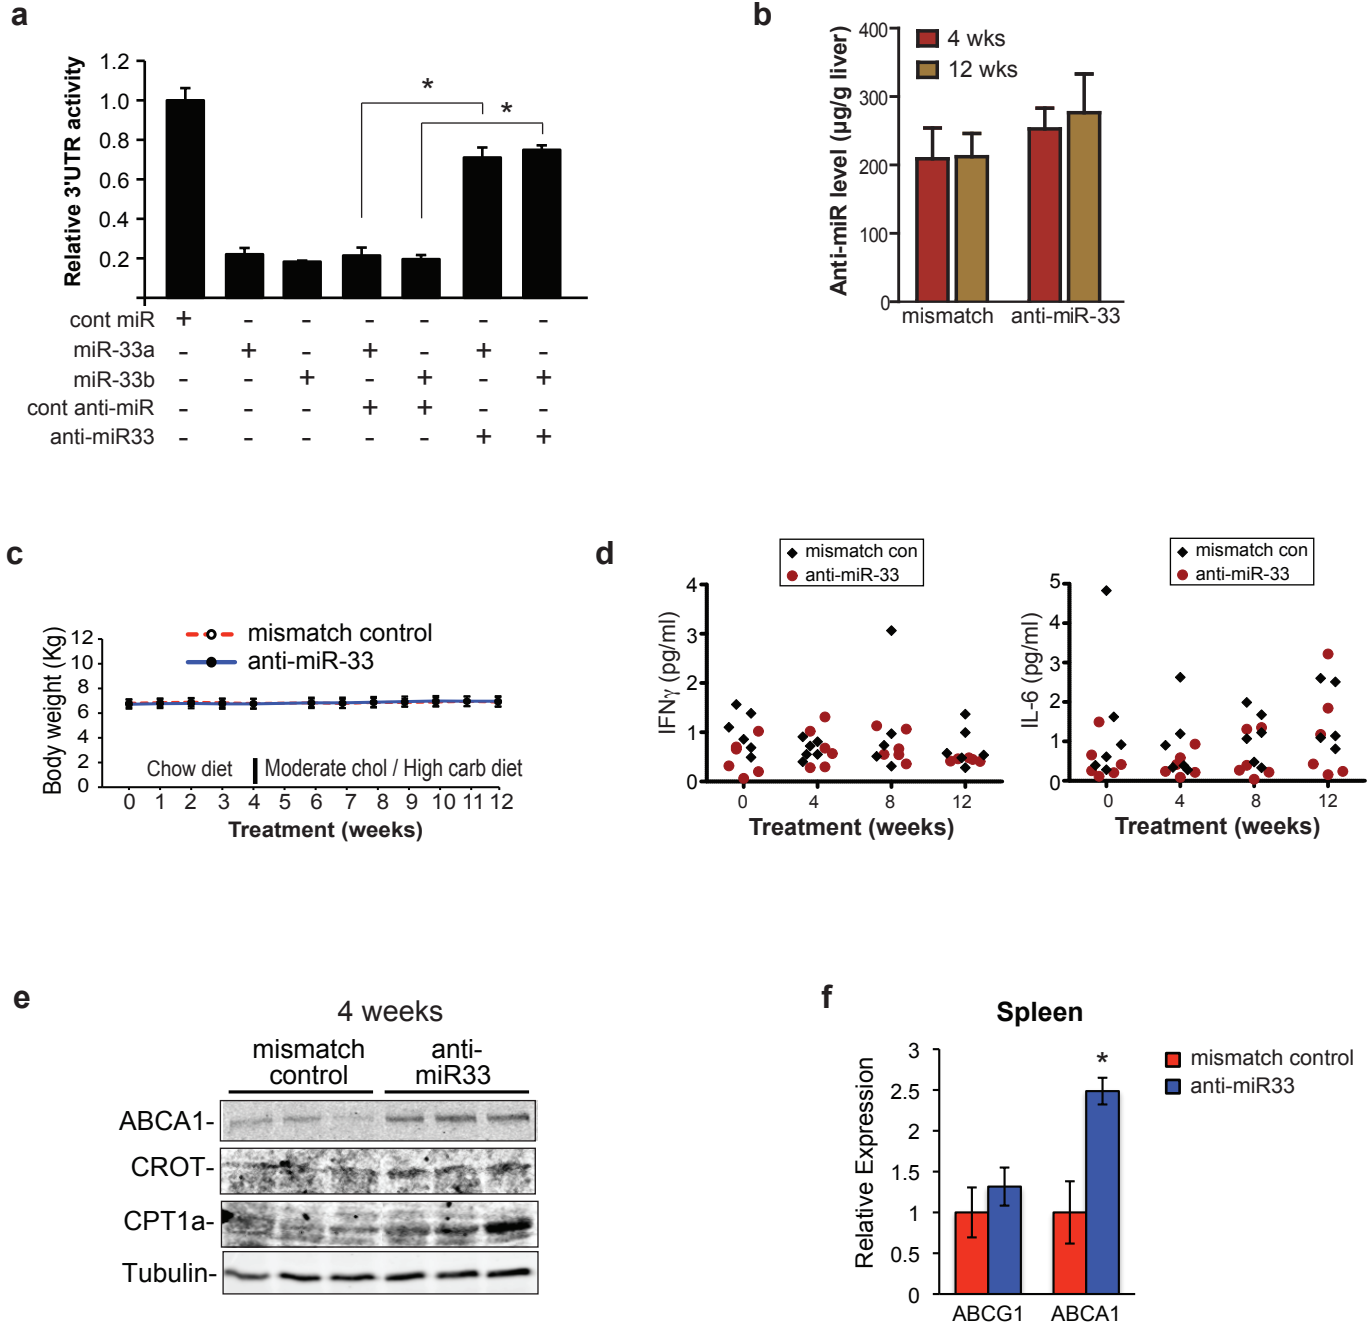

**SFig 1. Silencing of miR-33a/b in non-human primates.** (a) Relative activity of a luciferase reporter construct fused to the 3'UTR of human ABCA1 in HEK293 cells overexpressing miR-33a or miR-33b ( $1.7\text{-}3.5 \times 10^5$  copies/ng RNA) in the presence of anti-miR-33 or control mismatch oligonucleotide. Data are expressed as mean % 3'UTR activity of control miR  $\pm$  s.e.m and are representative of 3 experiments. (b) Hepatic levels of anti-miR-33 or mismatch control as measured by ion-pairing HPLC-ES/MS following 4 weeks and 12 weeks of treatment. (c) Body weight of anti-miR-33 or mismatch control oligonucleotide treated African green monkeys ( $n=6$  per group). (d) Plasma levels of IL-6 and IFN $\gamma$  at baseline and after 4, 8 and 12 weeks of treatment. (e) Western blot for ABCA1, Cpt1a and CROT in liver samples following 4 weeks of anti-miR treatment. (f) QRT-PCR analysis of ABCA1 and ABCG1 mRNA levels in the spleen following 12 weeks of anti-miR treatment. Data in d and f are the mean  $\pm$  SEM. \* $P \leq 0.05$ .

# Supplementary Figure 2.

## Abca1 3'-UTR

### binding site 1:134-140

3' -ACGUUACGUUGUC**GUUACGUG**-5' *hsa-miR-33b*

Hsa 5' -CUGUACUGAUACUAUU**CAAUGCA**AUGCAAUUCAAUGCAAUGA-3'

Ptr 5' -CUGUACUGAUACUAUU**CAAUGCA**AUGCAAUUCAAUGCAAUGA-3'

Mml 5' -----3'

Mmu 5' -CUGUACUGACACUAUU**CAAUGCA**AUGCACUUCAAUGCAACGA-3'

3' -ACGUUACGUUGAU**GUUACGUG**-5' *hsa-miR-33a*

Hsa 5' -CUGUACUGAUACUAUU**CAAUGCA**AUGCAAUUCAAUGCAAUGA-3'

Ptr 5' -CUGUACUGAUACUAUU**CAAUGCA**AUGCAAUUCAAUGCAAUGA-3'

Mml 5' -----3'

Mmu 5' -CUGUACUGACACUAUU**CAAUGCA**AUGCACUUCAAUGCAACGA-3'

### binding site 2:139-145

3' -ACGUUACGUUGUC**GUUACGUG**-5' *hsa-miR-33b*

Hsa 5' -CUGUACUGAUACUAUUCAAUG**CAAUGCA**AUUCAAUGCAAUGA-3'

Ptr 5' -CUGUACUGAUACUAUUCAAUG**CAAUGCA**AUUCAAUGCAAUGA-3'

Mml 5' -----3'

Mmu 5' -CUGUACUGACACUAUUCAAUG**CAAUGCA**CUUCAAUGCAACGA-3'

3' -ACGUUACGUUGAU**GUUACGUG**-5' *hsa-miR-33a*

Hsa 5' -CUGUACUGAUACUAUUCAAUG**CAAUGCA**AUUCAAUGCAAUGA-3'

Ptr 5' -CUGUACUGAUACUAUUCAAUG**CAAUGCA**AUUCAAUGCAAUGA-3'

Mml 5' -----3'

Mmu 5' -CUGUACUGACACUAUUCAAUG**CAAUGCA**CUUCAAUGCAACGA-3'

### binding site 3:149-155

3' -ACGUUACGUUGUC**GUUACGUG**-5' *hsa-miR-33b*

Hsa 5' -CUGUACUGAUACUAUUCAAUGCAAUGCAAUU**CAAUGCA**AUGA-3'

Ptr 5' -CUGUACUGAUACUAUUCAAUGCAAUGCAAUU**CAAUGCA**AUGA-3'

Mml 5' -----3'

Mmu 5' -CUGUACUGACACUAUUCAAUGCAAUGCACUU**CAAUGCA**ACGA-3'

3' -ACGUUACGUUGAU**GUUACGUG**-5' *hsa-miR-33a*

Hsa 5' -CUGUACUGAUACUAUUCAAUGCAAUGCAAUU**CAAUGCA**AUGA-3'

Ptr 5' -CUGUACUGAUACUAUUCAAUGCAAUGCAAUU**CAAUGCA**AUGA-3'

Mml 5' -----3'

Mmu 5' -CUGUACUGACACUAUUCAAUGCAAUGCACUU**CAAUGCA**ACGA-3'

## Abcg1 3'-UTR

### binding site 1:717-723

Hsa 5' -GCAGACAUU-----UUUAAAAGCUAUACAAAAAUUG-3'

Ptr 5' -GCAGACAUU-----UUUAAAAGCUAUACAAAAAUUG-3'

Mml 5' -GCAGAAUU-----UUUAAAAGCUAUACAAAACAUUG-3'

Mmu 5' -GCAGGACUAACGCAACG**CAAUGCA**ACGCAAUGCAGACAGUGC-3'

3' -ACGUUACGUUGUC**GUUACGUG**-5' *hsa-miR-33b*

Hsa 5' -GCAGACAUU-----UUUAAAAGCUAUACAAAAAUUG-3'

Ptr 5' -GCAGACAUU-----UUUAAAAGCUAUACAAAAAUUG-3'

Mml 5' -GCAGAAUU-----UUUAAAAGCUAUACAAAACAUUG-3'

Mmu 5' -GCAGGACUAACGCAACG**CAAUGCA**ACGCAAUGCAGACAGUGC-3'

3' -ACGUUACGUUGAU**GUUACGUG**-5' *hsa-miR-33a*

### binding site 2:727-733

Hsa 5' -GCAGACAUU-----UUUAAAAGCUAUACAAAAAUUG-3'

Ptr 5' -GCAGACAUU-----UUUAAAAGCUAUACAAAAAUUG-3'

Mml 5' -GCAGAAUU-----UUUAAAAGCUAUACAAAACAUUG-3'

Mmu 5' -GCAGGACUAACGCAACGCAAUGCAACG**CAAUGCA**GACAGUGC-3'

3' -ACGUUACGUUGUC**GUUACGUG**-5' *hsa-miR-33b*

Hsa 5' -GCAGACAUU-----UUUAAAAGCUAUACAAAAAUUG-3'

Ptr 5' -GCAGACAUU-----UUUAAAAGCUAUACAAAAAUUG-3'

Mml 5' -GCAGAAUU-----UUUAAAAGCUAUACAAAACAUUG-3'

Mmu 5' -GCAGGACUAACGCAACGCAAUGCAACG**CAAUGCA**GACAGUGC-3'

3' -ACGUUACGUUGAU**GUUACGUG**-5' *hsa-miR-33a*

## Crot 3'-UTR

### binding site 1: 216-222

3' -ACGUUACGUUGUC**GUUACGUG**-5' *hsa-miR-33b*

Hsa 5' -AAGC-UCCUCUGAUGCAGCAG**CAAUGCA**AAUUUUGACAU-3'

Ptr 5' -AAGC-UCCUCUGAUGCAGCAG**CAAUGCA**AAUUUUGACAU-3'

Mml 5' -AAGUCUCUGUGUUGCAACCA**CAAUGCA**AAAGUCAGAUU-3'

Mmu 5' -AAGC-UCCUCUGAUGCAGCAG**CAAUGCA**AAUUUUGACAU-3'

3' -ACGUUACGUUGAU**GUUACGUG**-5' *hsa-miR-33a*

Hsa 5' -AAGC-UCCUCUGAUGCAGCAG**CAAUGCA**AAUUUUGACAU-3'

Ptr 5' -AAGC-UCCUCUGAUGCAGCAG**CAAUGCA**AAUUUUGACAU-3'

Mml 5' -AAGUCUCUGUGUUGCAACCA**CAAUGCA**AAAGUCAGAUU-3'

Mmu 5' -AAGC-UCCUCUGAUGCAGCAG**CAAUGCA**AAUUUUGACAU-3'

### binding site 2: 292-298

3' -ACGUUACGUUGUC**GUUACGUG**-5' *hsa-miR-33b*

Hsa 5' -AAUCCAAUUCUACAACUUUAA**CAAUGCA**AGUCU-3'

Ptr 5' -AAUCCAAUUCUACAACUUUAA**CAAUGCA**AGUCU-3'

Mml 5' -AAUCCAAUUCUAAAAUUUAA**CAAUGCA**AAUCU-3'

3' -ACGUUACGUUGAU**GUUACGUG**-5' *hsa-miR-33a*

Hsa 5' -AAUCCAAUUCUACAACUUUAA**CAAUGCA**AGUCU-3'

Ptr 5' -AAUCCAAUUCUACAACUUUAA**CAAUGCA**AGUCU-3'

Mml 5' -AAUCCAAUUCUAAAAUUUAA**CAAUGCA**AAUCU-3'

## Cpt1a 3'-UTR

### binding site 1: 2499-2506

3' -ACGUUACGUUGUC**GUUACGUG**-5' *hsa-miR-33b*

Hsa 5' -AAUUGUUGCUAUCAGUGCAGUUAA**CAAUGCA**UUUUUUAU-3'

Ptr 5' -----3'

Mml 5' -----3'

Mmu 5' -AAUCACCCUCUCCUGAGCAGUU**CAAUGCA**UUUUUUAU-3'

3' -ACGUUACGUUGAU**GUUACGUG**-5' *hsa-miR-33a*

Hsa 5' -AAUUGUUGCUAUCAGUGCAGUUAA**CAAUGCA**UUUUUUAU-3'

Ptr 5' -----3'

Mml 5' -----3'

Mmu 5' -AAUCACCCUCUCCUGAGCAGUU**CAAUGCA**UUUUUUAU-3'

## Hadhb 3'-UTR

### binding site 1: 61-67

3' -ACGUUACGUUGUC**GUUACGUG**-5' *hsa-miR-33b*

Hsa 5' -CUCACACUAGGCAAUGCCAUUU**CAAUGCA**UUACUAAAUGACAUUG-3'

Ptr 5' -CUCACACUAGGCAAUGCCAUUU**CAAUGCA**UUACUAAAUGACAUUG-3'

Mml 5' -----3'

Mmu 5' -CUUGCACUGGGCAAUGCCAUUU**CAAUGCA**CUACCAAGUGAUACCUG-3'

3' -ACGUUACGUUGAU**GUUACGUG**-5' *hsa-miR-33a*

Hsa 5' -CUCACACUAGGCAAUGCCAUUU**CAAUGCA**UUACUAAAUGACAUUG-3'

Ptr 5' -CUCACACUAGGCAAUGCCAUUU**CAAUGCA**UUACUAAAUGACAUUG-3'

Mml 5' -----3'

Mmu 5' -CUUGCACUGGGCAAUGCCAUUU**CAAUGCA**CUACCAAGUGAUACCUG-3'

## Supplementary Figure 2 (cont'd).

### Prkaa1 3'-UTR

binding site 1: 115-121

```

3'-ACGUUACGUUGUCGUUACGUG-5' hsa-miR-33b
      |||
Hsa 5'-AGGGCUGGCGUUUUGGAAUGCAAUUUGCACAGG-3'
Ptr 5'-AGGGCUGGCGUUUUGGAAUGCAAUUUGCACAGG-3'
Mml 5'-AGGGCUGGCGUUUUGAAAUGCAAUUUGCACAGG-3'
Mmu 5'-AGGAUUGGCCUUUUGGAAUGCAGUUUGCACAGG-3'
  
```

```

3'-ACGUUACGUUGAUGUUACGUG-5' hsa-miR-33a
      |||
Hsa 5'-AGGGCUGGCGUUUUGGAAUGCAAUUUGCACAGG-3'
Ptr 5'-AGGGCUGGCGUUUUGGAAUGCAAUUUGCACAGG-3'
Mml 5'-AGGGCUGGCGUUUUGAAAUGCAAUUUGCACAGG-3'
Mmu 5'-AGGAUUGGCCUUUUGGAAUGCAGUUUGCACAGG-3'
  
```

binding site 2: 2532-2538

```

3'-ACGUUACGUUGUCGUUACGUG-5' hsa-miR-33b
      |||
Hsa 5'-AAGAGGUAA-GGGAGGCAAUGCAAAUGAUUUUUAA-3'
Ptr 5'-AAGAGAUAA-GGGAGGCAAUGCAAAUGAUUUUUAA-3'
Mml 5'-GGGAGGUAA-GGGAGGCAAUGCAAAUGAUUUUUAA-3'
Mmu 5'-AAAAGUAAAAGGGAGUCAAUGCAAAUGAUUUUUAA-3'
  
```

```

3'-ACGUUACGUUGAUGUUACGUG-5' hsa-miR-33a
      |||
Hsa 5'-AAGAGGUAA-GGGAGGCAAUGCAAAUGAUUUUUAA-3'
Ptr 5'-AAGAGAUAA-GGGAGGCAAUGCAAAUGAUUUUUAA-3'
Mml 5'-GGGAGGUAA-GGGAGGCAAUGCAAAUGAUUUUUAA-3'
Mmu 5'-AAAAGUAAAAGGGAGUCAAUGCAAAUGAUUUUUAA-3'
  
```

### Sirt6 3'-UTR

binding site 1: 478-484

```

3'-ACGUUACGUUGUCGUUACGUG-5' hsa-miR-33b
      |||
Hsa 5'-AGGCUUCUGGAAAAGUCCUCAAUGCAAAUAAAAACAAUUU-3'
Ptr 5'-AGGCUUCUGGAAAAGUCCUCAAUGCAAAUAAAAACAAUUU-3'
Mml 5'-AGGCUUCUGGAAAAGUCCUCAAUGCAAAUAAAA--AUUU-3'
Mmu 5'------3'
  
```

```

3'-ACGUUACGUUGAUGUUACGUG-5' hsa-miR-33a
      |||
Hsa 5'-AGGCUUCUGGAAAAGUCCUCAAUGCAAAUAAAAACAAUUU-3'
Ptr 5'-AGGCUUCUGGAAAAGUCCUCAAUGCAAAUAAAAACAAUUU-3'
Mml 5'-AGGCUUCUGGAAAAGUCCUCAAUGCAAAUAAAA--AUUU-3'
Mmu 5'------3'
  
```

### Irs2 3'-UTR

binding site 1: 1577-1583

```

3'-ACGUUACGUUGUCGUUACGUG-5' hsa-miR-33b
      |||
Hsa 5'-UAUAUUUAAUUGGCAAUGCAAAAGUCUUCUGCUUCCGU-3'
Ptr 5'-UAUAUUUAAUUGGCAAUGCAAAAGUCUUCUGCUUCCGU-3'
Mml 5'-UAUAUUUAAUUGGCAAUGCAAAAGUCUUCUGCUUCCGU-3'
Mmu 5'-UAUAUUUAAUUGGCAAUGCAAGCAGUCUUCUGCUUCCGU-3'
  
```

```

3'-ACGUUACGUUGAUGUUACGUG-5' hsa-miR-33a
      |||
Hsa 5'-UAUAUUUAAUUGGCAAUGCAAAAGUCUUCUGCUUCCGU-3'
Ptr 5'-UAUAUUUAAUUGGCAAUGCAAAAGUCUUCUGCUUCCGU-3'
Mml 5'-UAUAUUUAAUUGGCAAUGCAAAAGUCUUCUGCUUCCGU-3'
Mmu 5'-UAUAUUUAAUUGGCAAUGCAAGCAGUCUUCUGCUUCCGU-3'
  
```

### Sirt1 3'-UTR

binding site 1: 1518-1524

```

3'-ACGUUACGUUGUCGUUACGUG-5' hsa-miR-33b
      |||
Hsa 5'-AUUUGGCUACACUAAAGAAUGCAAGUAUUUUAGUUUCC-3'
Ptr 5'-AUUUGGCUACACUAAAGAAUGCAAGUAUUUUAGUUUCC-3'
Mml 5'-AUUUGGCUACACUAAAGAAUGCAAGUAUUUUAGUUUCC-3'
Mmu 5'-AUUUGGCUACACUAAAGAAUGCAAGUAUUUUAGUUUCC-3'
  
```

```

3'-ACGUUACGUUGAUGUUACGUG-5' hsa-miR-33a
      |||
Hsa 5'-AUUUGGCUACACUAAAGAAUGCAAGUAUUUUAGUUUCC-3'
Ptr 5'-AUUUGGCUACACUAAAGAAUGCAAGUAUUUUAGUUUCC-3'
Mml 5'-AUUUGGCUACACUAAAGAAUGCAAGUAUUUUAGUUUCC-3'
Mmu 5'-AUUUGGCUACACUAAAGAAUGCAAGUAUUUUAGUUUCC-3'
  
```

### NPC1 3'-UTR

binding site 1: 443-449

```

3'-ACGUUACGUUGUCGUUACGUG-5' hsa-miR-33b
      |||
Hsa 5'-UAAAGAGCUUUUUAAUGCAAAUAAUUAAACUUUGUACAC-3'
Ptr 5'-UAAAGAGCUUUUUAAUGCAAAUAAUUAAACUUUGUACAC-3'
Mml 5'-UAAAGAGCUUUUUAAUGCAAAUAAUUAAACUUUGUACAC-3'
Mmu 5'-UAAAGAGCUUUUUAAUGCAAAUAAUUAAACUUUGUACA--3'
  
```

```

3'-ACGUUACGUUGAUGUUACGUG-5' hsa-miR-33b
      |||
Hsa 5'-UAAAGAGCUUUUUAAUGCAAAUAAUUAAACUUUGUACAC-3'
Ptr 5'-UAAAGAGCUUUUUAAUGCAAAUAAUUAAACUUUGUACAC-3'
Mml 5'-UAAAGAGCUUUUUAAUGCAAAUAAUUAAACUUUGUACAC-3'
Mmu 5'-UAAAGAGCUUUUUAAUGCAAAUAAUUAAACUUUGUACA--3'
  
```

## SFig 2. Predicted target sites of miR-33 in the 3'UTR of indicated genes.

Predicted miR-33a/b binding sites in the indicated genes are shown by bolded sequence in the following species: Hsa=human; Ptr=chimpanzee; Mml=rhesus; Mmu=mouse.

Supplementary Fig 3. Rayner et al.

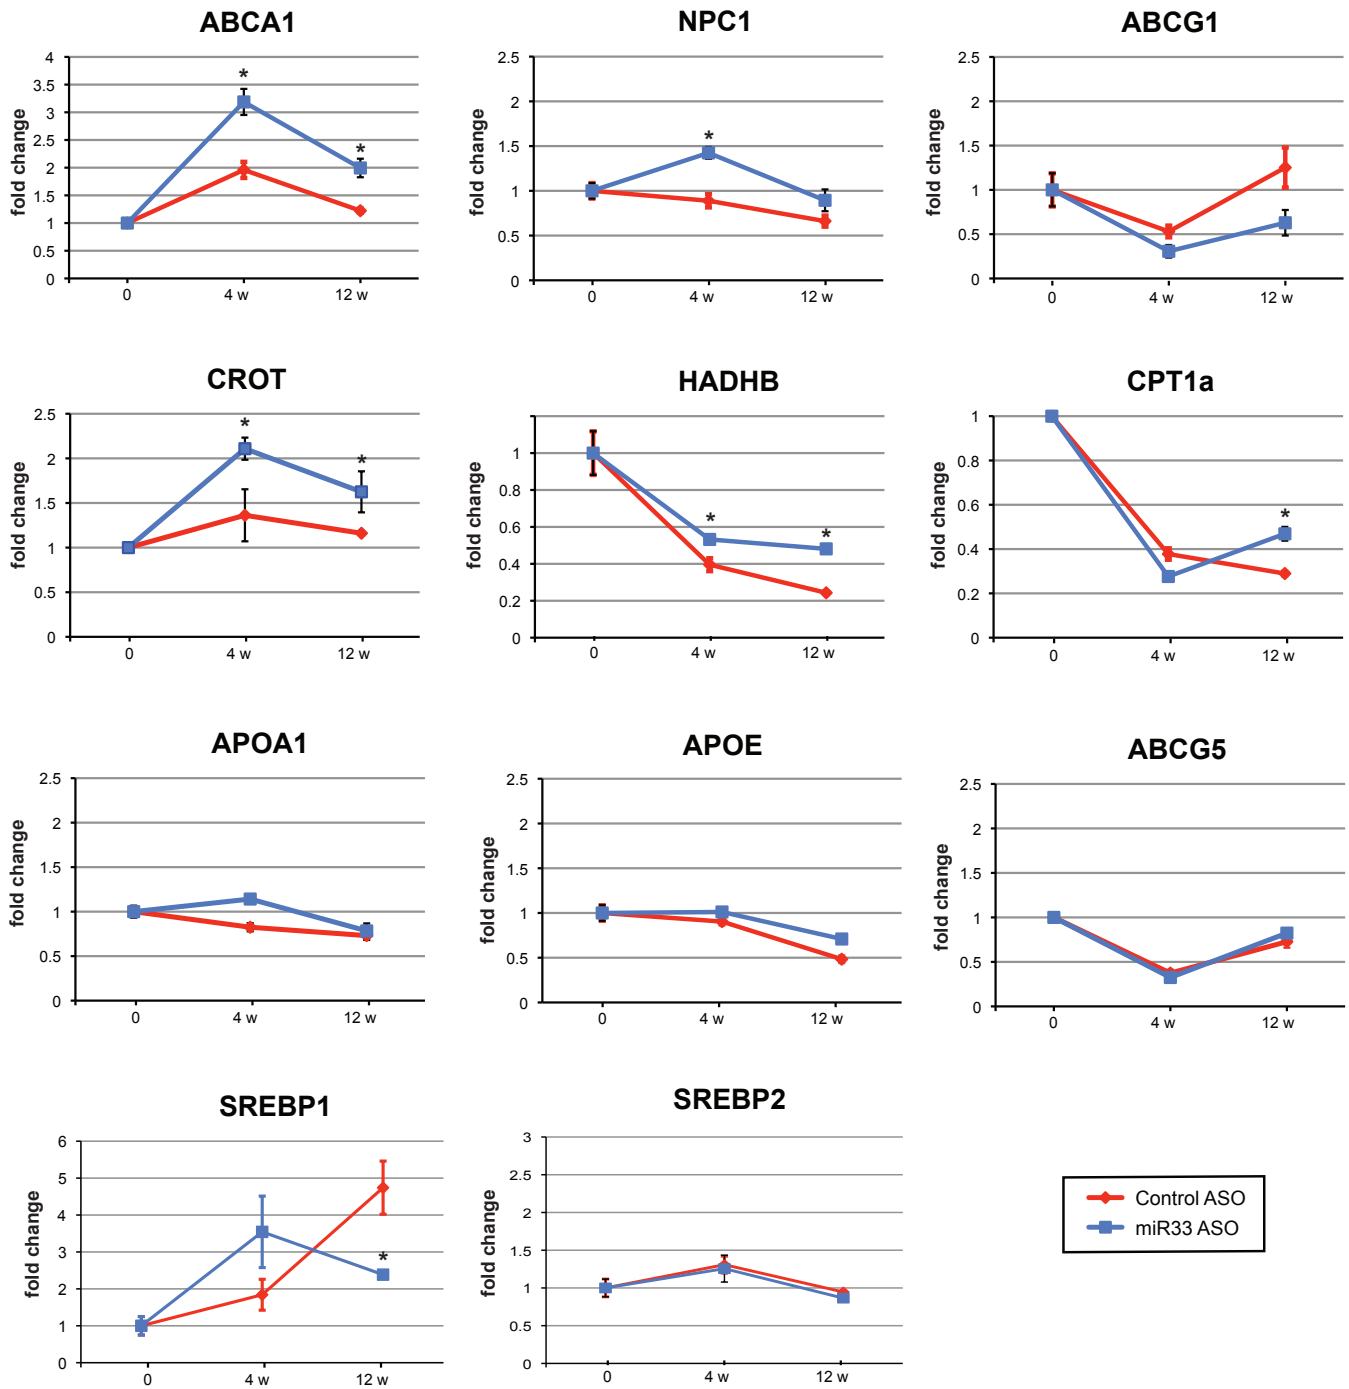

**SFig 3.** QRT-PCR analysis of hepatic mRNA expression at baseline (time 0), 4 or 12 weeks of anti-miR treatment. Data are the mean  $\pm$  SEM. \*P  $\leq$  0.05.

## Supplementary Figure 4.

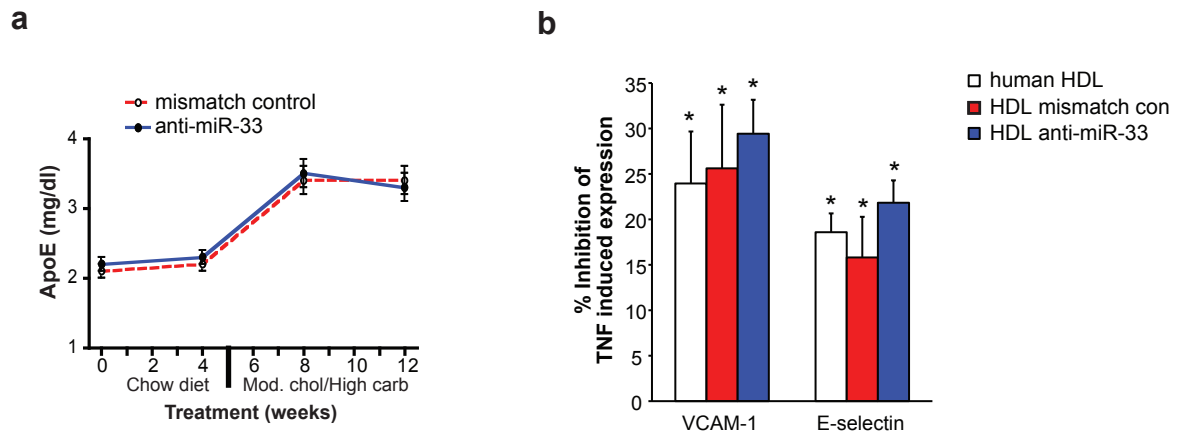

**SFig 4. Characterization of plasma HDL.** (a) Plasma apoE in anti-miR treated monkeys. \* $P \leq 0.05$ . (b) Inhibition of TNF $\alpha$ -induced VCAM-1 and E-selectin on endothelial cells treated with human HDL (500  $\mu\text{g}$  protein/ml), or equal volumes of PEG-isolated HDL from anti-miR treated monkeys. Data are the mean  $\pm$  SD and are representative of 3 experiments. \* $P \leq 0.05$ .
